# Supplementary figures and images for: Comparison of a powered bone marrow biopsy device with a manual system: results of a prospective randomised controlled trial
Source: PubMed Central journal article supplement — J Clin Pathol. 2012 Oct 26;66(1):24–8. doi: 10.1136/jclinpath-2012-201167 (PMC3534307; doi:10.1136/jclinpath-2012-201167), 2012-10-26

## Supplemental Figure 1

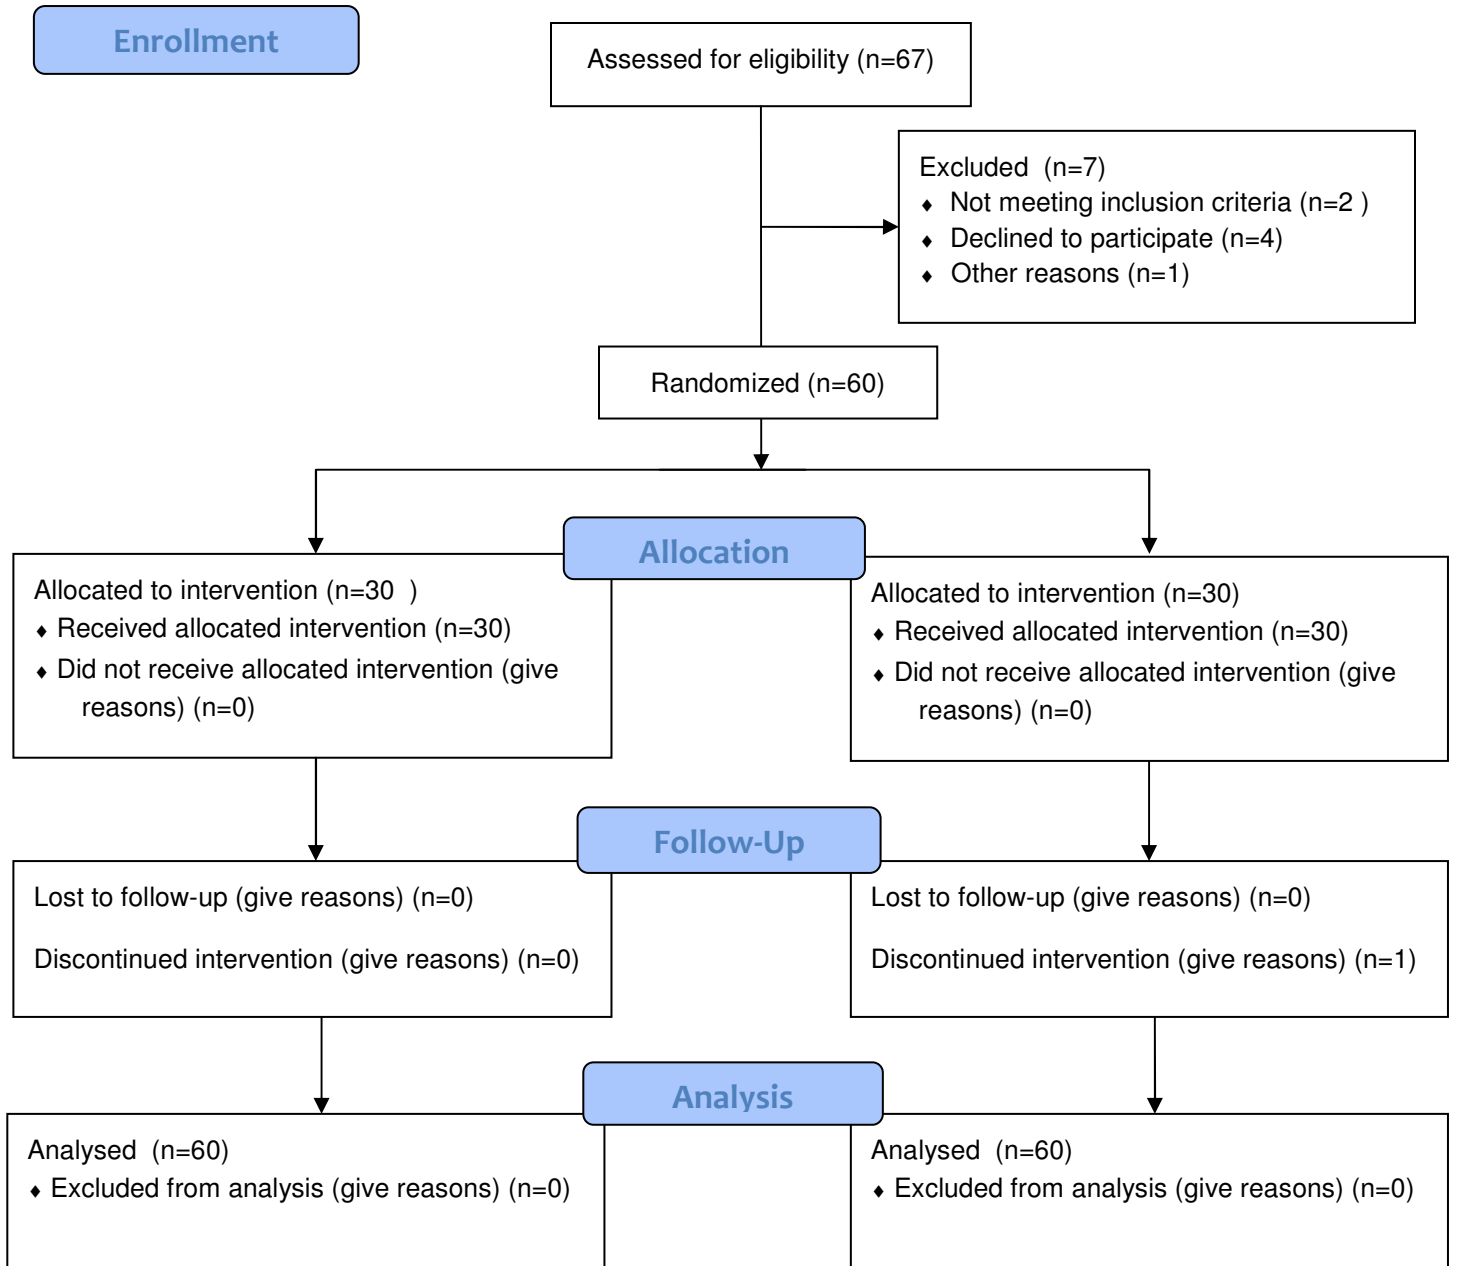

Supplement: jclinpath-2012-201167-s1.pdf [file jclinpath-2012-201167-s1.pdf]
